# Supplementary material for: Gas-phase volatilomic approaches for quality control of brewing hops based on simultaneous GC-MS-IMS and machine learning
Source: PubMed Central journal article supplement (PMC7497504; doi:10.1007/s00216-020-02842-y), 2020-08-04
Supplement: 216_2020_2842_MOESM1_ESM.pdf [file 216_2020_2842_MOESM1_ESM.pdf]

**Analytical and Bioanalytical Chemistry**

**Electronic Supplementary Material**

**Gas-phase volatilomic approaches for quality control of brewing hops  
based on simultaneous GC-MS-IMS and machine learning**

Rebecca Brendel, Sebastian Schwolow, Sascha Rohn, Philipp Weller

**Table S1** List of hop samples

| Number | Name                     | Origin | $\alpha$ -acid [%w/w] | Harvest year |
|--------|--------------------------|--------|-----------------------|--------------|
| 1      | Pacific Gem              | NZ     | 14,6                  | 2017         |
| 2      | Tahoma                   | USA    | 6,1                   | 2017         |
| 3      | Citra                    | USA    | 12,8                  | 2017         |
| 4      | Willamette               | USA    | 4                     | 2017         |
| 5      | Spalter Select           | DE     | 5,2                   | 2017         |
| 6      | Fuggles                  | GB     | 5,9                   | 2017         |
| 7      | Opal                     | DE     | 7,1                   | 2017         |
| 8      | Huell Melon              | DE     | 6,3                   | 2017         |
| 9      | Mosaic                   | USA    | 12,8                  | 2017         |
| 10     | Kohatu                   | NZ     | 7,1                   | 2017         |
| 11     | Waimea                   | NZ     | 15,5                  | 2017         |
| 12     | Vic Secret               | AUS    | 18,1                  | 2018         |
| 13     | Barbe Rouge              | FR     | 9,1                   | 2017         |
| 14     | Summit                   | USA    | 15,2                  | 2016         |
| 15     | Warrior                  | USA    | 15,6                  | 2017         |
| 16     | Lemondrop                | USA    | 5,4                   | 2017         |
| 17     | Hallertauer Amarillo     | DE     | 7                     | 2017         |
| 18     | Hallertauer Blanc        | DE     | 9,8                   | 2018         |
| 19     | Galena                   | USA    | 14,20                 | 2016         |
| 20     | Hueller Bitter           | DE     | 5,7                   | 2015         |
| 21     | Spalter Select           | DE     | 4,1                   | 2018         |
| 22     | Mosaic                   | USA    | 13,3                  | 2018         |
| 23     | Barbe Rouge              | FR     | 9,1                   | 2017         |
| 24     | Azacca                   | USA    | 12,7                  | 2017         |
| 25     | Tettnanger               | DE     | 3,4                   | 2018         |
| 26     | Minstrel                 | GB     | 5,7                   | 2018         |
| 27     | Crystal                  | USA    | 3,3                   | 2018         |
| 28     | Callista                 | DE     | 2,9                   | 2018         |
| 29     | Centennial               | USA    | 9,6                   | 2017         |
| 30     | Cascade                  | USA    | 5,5                   | 2018         |
| 31     | Premiant                 | CZ     | 6,7                   | 2017         |
| 32     | Ahtanum                  | USA    | 4                     | 2017         |
| 33     | Brewers Gold             | DE     | 6                     | 2018         |
| 34     | Styrian Golding (Celeia) | SLO    | 3,1                   | 2018         |
| 35     | Hersbrucker Spät         | DE     | 1,9                   | 2018         |
| 36     | Golding                  | GB     | 5,6                   | 2017         |
| 37     | Hallertauer Cascade      | DE     | 5,1                   | 2018         |
| 38     | Delta                    | USA    | 6,1                   | 2017         |
| 39     | Jarrylo                  | USA    | 13,4                  | 2017         |
| 40     | Kazbek                   | CZ     | 5,5                   | 2018         |
| 41     | Ariana                   | DE     | 9,9                   | 2018         |
| 42     | Hallertauer Comet        | DE     | 5,1                   | 2018         |
| 43     | Perle                    | DE     | 6                     | 2018         |
| 44     | Styrian Kolibri          | SLO    | 2,8                   | 2018         |
| 45     | Lubelski                 | PL     | 2                     | 2018         |
| 46     | Yellow Sub               | DE     | 6,2                   | 2018         |
| 47     | El Dorado                | USA    | 15                    | 2017         |
| 48     | Triskel                  | FR     | 2,6                   | 2018         |
| 49     | Aurora                   | SLO    | 7,7                   | 2018         |
| 50     | Amarillo                 | USA    | 8,4                   | 2017         |
| 51     | Strisselspalter          | FR     | 1,8                   | 2018         |
| 52     | Saphir                   | DE     | 4                     | 2017         |
| 53     | Herkules                 | DE     | 15,4                  | 2018         |
| 54     | Mandarina Bavaria        | DE     | 7,9                   | 2018         |
| 55     | Hallertauer Mittelfrüh   | DE     | 3,9                   | 2018         |
| 56     | Smaragd                  | DE     | 5,7                   | 2017         |
| 57     | Hüll Melon               | DE     | 7,8                   | 2016         |
| 58     | Ariana                   | DE     | 6,9                   | 2017         |
| 59     | Hersbrucker              | DE     | 2,3                   | 2016         |
| 60     | Hallertauer Mittelfrüh   | DE     | 3,3                   | 2017         |
| 61     | Spalter                  | DE     | 3,4                   | 2017         |
| 62     | Mandarina Bavaria        | DE     | 7,7                   | 2017         |
| 63     | Hallertauer Magnum       | DE     | 10,9                  | 2018         |
| 64     | Hallertauer Blanc        | DE     | 8,7                   | 2018         |
| 65     | Tettnanger               | DE     | 3,1                   | 2018         |

AUS= Australia, CZ= Czech Republic, DE= Germany, FR= France, GB= Great Britain, NZ= New Zealand, PL= Poland, SLO= Slovenia, USA= United States of America

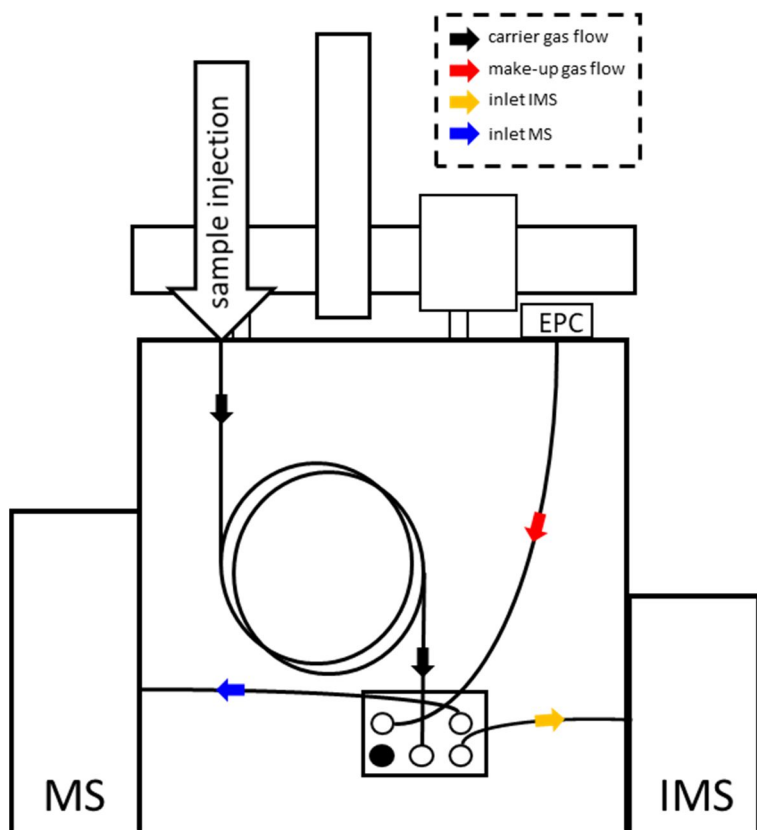

**Fig. S1** Setup of the HS-GC-MS-IMS system with electronic pressure control (EPC)

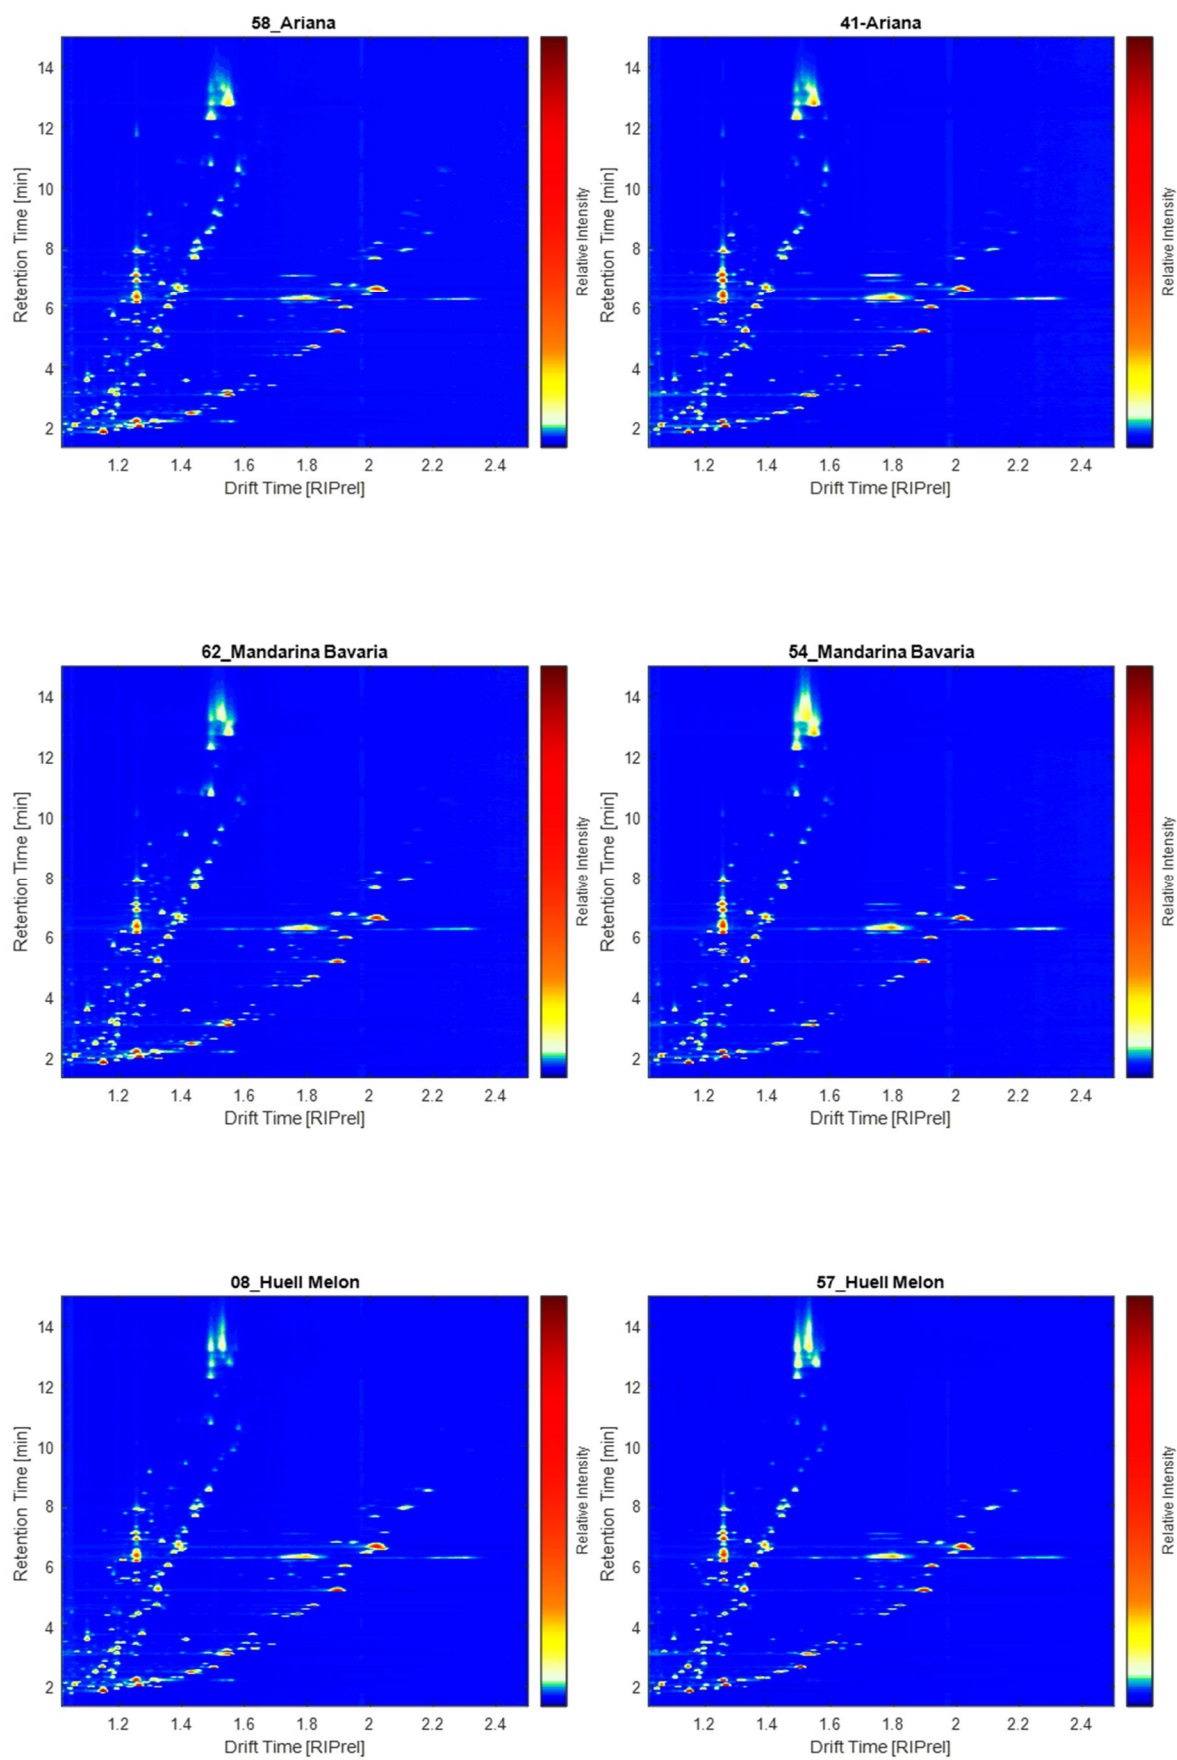

**Fig. S2** The ion mobility spectra of the hop cultivars Ariana, Mandarinina Bavaria and Huell Melon from different harvest years

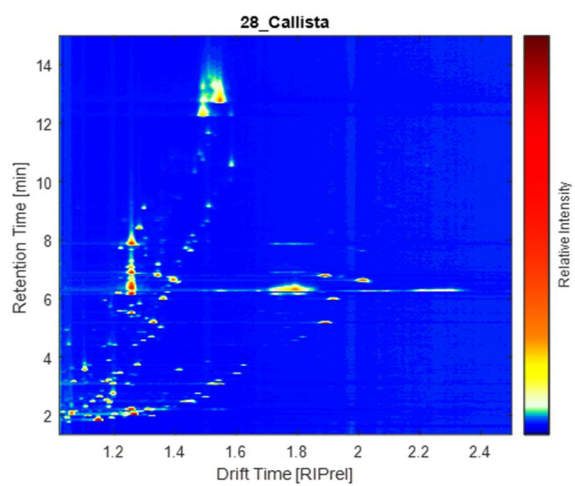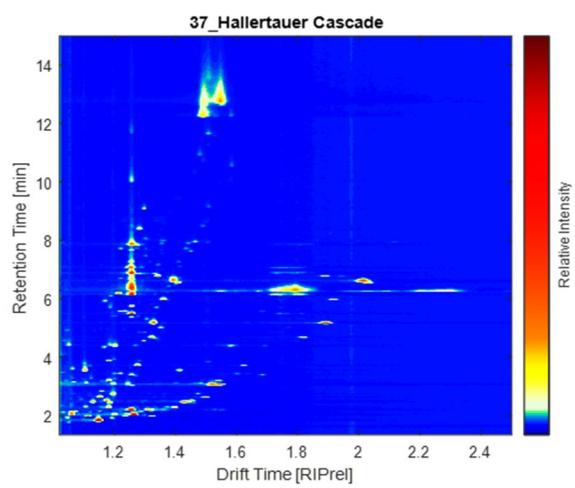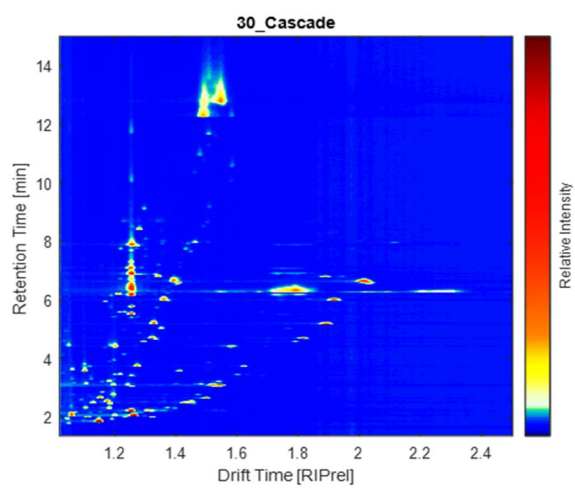

**Fig. S3** The ion mobility spectra of the hop cultivars Callista, Hallertauer Cascade and Cascade
